# Supplementary material for: Effects of Multiple Environmental Stressors on Zoobenthos Communities in Shallow Lakes: Evidence from a Mesocosm Experiment
Source: MDPI journal article supplement (doi:10.3390/ani13233722), 2023-12-01
Supplement: s1 [file s1]

**Table S1.** Effects of temperature, eutrophication, pesticide, and their interactions on zoobenthos abundance at the end of the experiment. Accumfreq represents the cumulative proportion of species abundance. "\*\*\*\*" represents highly significant ( $p \leq 0.001$ ), "\*\*\*" represents significant ( $0.001 < p \leq 0.01$ ), "\*\*" represents moderately significant ( $0.01 < p \leq 0.05$ ), "." represents approaching significance ( $0.05 < p \leq 0.1$ ), "NS" represents not significant ( $p > 0.1$ ); "(+)" represents positive correlation ( $r > 0$ ), "(-)" represents negative correlation ( $r \leq 0$ ).

| Species name                     | Rank | Abundance | Accumfreq | Warming | Eutrophic | Pesticide |
|----------------------------------|------|-----------|-----------|---------|-----------|-----------|
| <i>Chironomus sp.</i>            | 1    | 1820      | 15.5      | ** (+)  | NS        | *** (+)   |
| <i>Glyptotendipes sp.</i>        | 2    | 1690      | 29.9      | NS      | NS        | * (-)     |
| <i>Ecnomus sp.</i>               | 3    | 1497      | 42.6      | NS      | NS        | *** (-)   |
| <i>Radix swinhoei</i>            | 4    | 1063      | 51.7      | *** (+) | * (+)     | *** (+)   |
| <i>Limnodrilus hoffmeisteri</i>  | 5    | 881       | 59.2      | * (-)   | ** (+)    | ** (-)    |
| <i>Glossiphonia lata</i>         | 6    | 600       | 64.3      | NS      | NS        | * (+)     |
| <i>Hippeutis umbilicalis</i>     | 7    | 463       | 68.2      | NS      | NS        | * (+)     |
| <i>Polypedilum sp.</i>           | 8    | 452       | 72.1      | NS      | NS        | NS        |
| <i>Limnodrilus sp.</i>           | 9    | 391       | 75.4      | NS      | NS        | NS        |
| <i>Bellamyia sp.</i>             | 10   | 334       | 78.2      | NS      | NS        | NS        |
| <i>Branchiura sowerbyi</i>       | 11   | 322       | 81        | NS      | NS        | *** (-)   |
| <i>Sympetrum sp.</i>             | 12   | 251       | 83.1      | . (+)   | NS        | NS        |
| <i>Limnodrilus claparedianus</i> | 13   | 247       | 85.2      | NS      | NS        | NS        |
| <i>Alocinma longicornis</i>      | 14   | 215       | 87        | NS      | NS        | NS        |
| <i>Parachironomus sp.</i>        | 15   | 211       | 88.8      | NS      | NS        | *** (+)   |
| <i>Bellamyia_aeruginosa</i>      | 16   | 167       | 90.3      | NS      | NS        | NS        |
| <i>Ischnura sp.</i>              | 17   | 143       | 91.5      | NS      | NS        | NS        |
| <i>Parafossarulus striatulus</i> | 18   | 131       | 92.6      | NS      | NS        | NS        |
| <i>Cricotopus trifasciatur</i>   | 19   | 108       | 93.5      | NS      | NS        | *** (+)   |
| <i>Pila sp.</i>                  | 20   | 104       | 94.4      | NS      | NS        | * (+)     |
| <i>Assimineia sp.</i>            | 21   | 103       | 95.3      | NS      | NS        | NS        |
| <i>Bithynia fuchsiana</i>        | 22   | 91        | 96        | NS      | NS        | . (+)     |
| <i>Bellamyia angularia</i>       | 23   | 64        | 96.6      | . (-)   | NS        | NS        |
| <i>Ablabesmyia sp.</i>           | 24   | 53        | 97        | NS      | NS        | NS        |
| <i>Bellamyia purificata</i>      | 25   | 50        | 97.5      | NS      | NS        | NS        |
| <i>Paludinella stricta</i>       | 26   | 39        | 97.8      | NS      | NS        | . (+)     |
| <i>Orthocladus sp.</i>           | 27   | 20        | 98        | NS      | NS        | * (+)     |
| <i>Hippeutis cantori</i>         | 28   | 17        | 98.1      | NS      | NS        | NS        |
| <i>Bithynia misella</i>          | 29   | 16        | 98.2      | NS      | NS        | NS        |
| <i>Radix plicatula</i>           | 30   | 15        | 98.4      | NS      | NS        | NS        |
| <i>Physa acuta</i>               | 31   | 14        | 98.5      | NS      | NS        | NS        |
| <i>Tanytarsus sp.</i>            | 32   | 14        | 98.6      | NS      | . (+)     | NS        |
| <i>Parapoyx sp.</i>              | 33   | 14        | 98.7      | . (+)   | NS        | . (+)     |
| <i>Limnodrilus grandisetosus</i> | 34   | 12        | 98.8      | NS      | NS        | NS        |
| <i>Cloeon sp.</i>                | 35   | 11        | 98.9      | NS      | NS        | * (-)     |
| <i>Paracercion sp.</i>           | 36   | 11        | 99        | NS      | NS        | NS        |
| <i>Chironomidae pupa</i>         | 37   | 11        | 99.1      | NS      | NS        | NS        |
| <i>Cricotopus sp.</i>            | 38   | 10        | 99.2      | NS      | NS        | NS        |
| <i>Barbronia weberi</i>          | 39   | 8         | 99.3      | NS      | NS        | NS        |
| <i>Polypylis hemisphaerula</i>   | 40   | 7         | 99.3      | NS      | NS        | NS        |
| <i>Paraplea sp.</i>              | 41   | 6         | 99.4      | NS      | NS        | NS        |

|                                |    |   |      |    |    |       |
|--------------------------------|----|---|------|----|----|-------|
| <i>Bellaamya dispiralis</i>    | 42 | 5 | 99.4 | NS | NS | NS    |
| <i>Clinotanypus sp.</i>        | 43 | 5 | 99.5 | NS | NS | NS    |
| <i>Gyraulus albus</i>          | 44 | 5 | 99.5 | NS | NS | NS    |
| <i>Nigrobaetis sp.</i>         | 45 | 5 | 99.5 | NS | NS | NS    |
| <i>Tanypus sp.</i>             | 46 | 5 | 99.6 | NS | NS | NS    |
| <i>Harnischia sp.</i>          | 47 | 5 | 99.6 | NS | NS | NS    |
| <i>Rheopelopia sp.</i>         | 48 | 5 | 99.7 | NS | NS | NS    |
| <i>Bellamya quadrata</i>       | 49 | 4 | 99.7 | NS | NS | NS    |
| <i>Ephydridae</i>              | 50 | 4 | 99.7 | NS | NS | NS    |
| <i>Pseudothemis zonata</i>     | 51 | 3 | 99.8 | NS | NS | NS    |
| <i>Macrobrachium sp.</i>       | 52 | 3 | 99.8 | NS | NS | NS    |
| <i>Dicrotendipes sp.</i>       | 53 | 3 | 99.8 | NS | NS | NS    |
| <i>Parafossarulus eximius</i>  | 54 | 3 | 99.8 | NS | NS | NS    |
| <i>Orthetrum sp.</i>           | 55 | 3 | 99.9 | NS | NS | . (-) |
| <i>Anax parthenope</i>         | 56 | 2 | 99.9 | NS | NS | NS    |
| <i>Procladius sp.</i>          | 57 | 2 | 99.9 | NS | NS | NS    |
| <i>Caenis sp.</i>              | 58 | 1 | 99.9 | NS | NS | NS    |
| <i>Glossiphonia complanata</i> | 59 | 1 | 99.9 | NS | NS | NS    |
| <i>Anodonta angula</i>         | 60 | 1 | 99.9 | NS | NS | NS    |
| <i>Limnodrilus udekemianus</i> | 61 | 1 | 99.9 | NS | NS | NS    |
| <i>Valvata sp.</i>             | 62 | 1 | 99.9 | NS | NS | NS    |
| <i>Baetis sp.</i>              | 63 | 1 | 100  | NS | NS | NS    |
| <i>Nais inflata</i>            | 64 | 1 | 100  | NS | NS | NS    |
| <i>Polypedilum scalaenum</i>   | 65 | 1 | 100  | NS | NS | NS    |
| <i>Hydrophilus sp.</i>         | 66 | 1 | 100  | NS | NS | NS    |
| <i>Paratanytarsus sp.</i>      | 67 | 1 | 100  | NS | NS | NS    |
| <i>Hydrobaenus sp.</i>         | 68 | 1 | 100  | NS | NS | NS    |

---
